# Supplementary material for: Water Plasma Functionalized CNTs/MnO2 Composites for Supercapacitors
Source: Hindawi journal article supplement (doi:10.1155/2013/832581), 2013-01-01
Supplement: f1 [file 832581.f1.pdf]

## Supplementary information

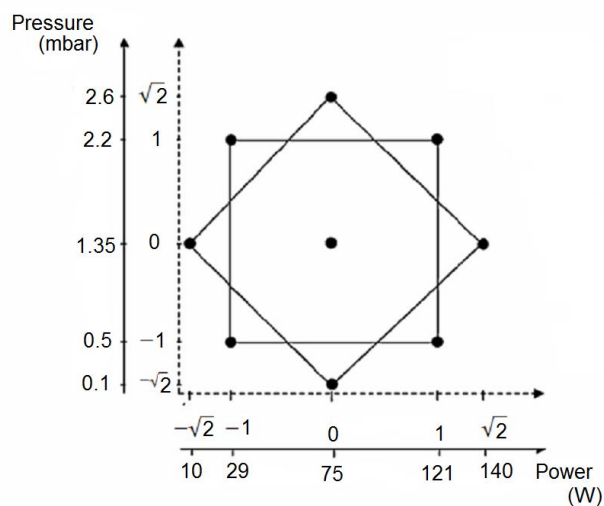

Fig. S1. Box-Wilson experimental design samples distribution for two main parameters (RF power and water pressure).

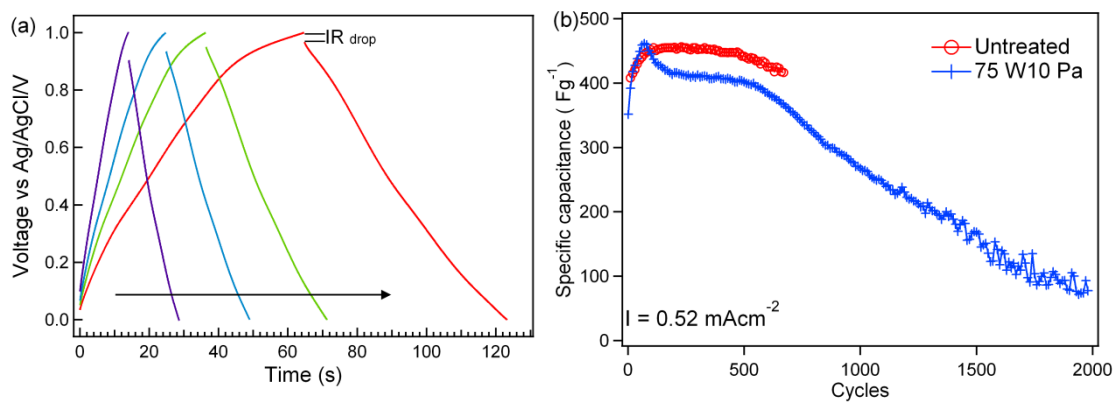

Fig. S2. (a) Charge/discharge curves obtained at different current densities from 0.1, 0.2, 0.3, 0.4  $\text{mAcm}^{-2}$ , as indicated by the arrow for wpCNTs/ $\text{MnO}_2$  (10 W, 135 Pa) and (b) charge/discharge cyclic stability between 0 and 1 V for untreated and water plasma treated CNTs/ $\text{MnO}_2$  electrodes.

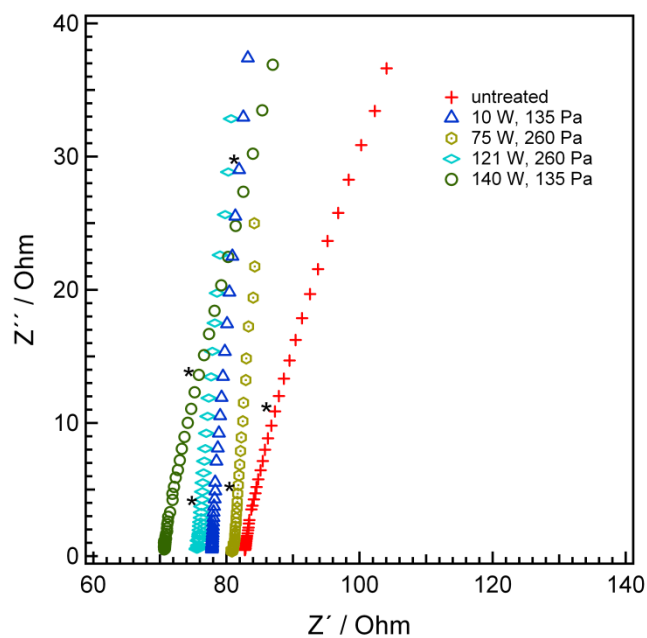

Fig. S3 Nyquist plot of untreated and different wpCNTs/MnO<sub>2</sub> samples. Asterisks correspond to a frequency of 9.32 Hz.

Table S4. Peak position and percentage area of different bonds obtained from XPS O1s spectra .

| Sample                                                  |                    | (BE) (eV) | % area |
|---------------------------------------------------------|--------------------|-----------|--------|
| wpCNTs/MnO <sub>2</sub> before cycling                  | Mn-O-Mn            | 529.44    | 33.79  |
|                                                         | Mn-O-OH            | 530.88    | 24.36  |
|                                                         | H-O-H              | 532.39    | 13.89  |
|                                                         | Chemisorbed oxygen | 535.26    | 27.96  |
| wpCNTs/MnO <sub>2</sub> (0 – 1 V) after 2000 cycles     | Mn-O-Mn            | 529.29    | 20.88  |
|                                                         | Mn-O-OH            | 530.71    | 13.69  |
|                                                         | H-O-H              | 523.36    | 7.68   |
|                                                         | Chemisorbed oxygen | 535.07    | 57.75  |
| wpCNTs/MnO <sub>2</sub> (0.1 – 0.8 V) after 2000 cycles | Mn-O-Mn            | 529.31    | 23.17  |
|                                                         | Mn-O-OH            | 530.84    | 17.37  |
|                                                         | H-O-H              | 532.55    | 3.7    |
|                                                         | Chemisorbed oxygen | 534.91    | 55.75  |
